# Supplementary material for: Epoxyazadiradione suppresses breast tumor growth through mitochondrial depolarization and caspase-dependent apoptosis by targeting PI3K/Akt pathway
Source: Springer Nature journal article supplement (doi:10.1186/s12885-017-3876-2), 2018-01-08
Supplement: MOESM1 [file 15349932]

# **Epoxyazadiradione Suppresses Breast Tumor Growth Through Mitochondrial Depolarization and Caspase-Dependent Apoptosis by Targeting PI3K/Akt Pathway**

**Dhiraj Kumar<sup>1</sup>, Saikat Haldar<sup>2#</sup>, Mahadeo Gorain<sup>1#</sup>, Santosh Kumar<sup>3</sup>, Fayaj A. Mulani<sup>2</sup>, Amit S. Yadav<sup>1</sup>, Lucio Miele<sup>4</sup>, Hirekodathakallu V. Thulasiram<sup>2</sup>, Gopal C. Kundu<sup>1\*</sup>**

<sup>1</sup>Laboratory of Tumor Biology, Angiogenesis and Nanomedicine Research, National Centre for Cell Science (NCCS), Pune 411007, India

<sup>2</sup>Chemical Biology Unit, Division of Organic Chemistry, CSIR-National Chemical Laboratory, Pune 411008, India

<sup>3</sup>Department of Biochemistry and Molecular and Cellular Biology, Georgetown University Medical Center, Washington D.C. 20057, USA

<sup>4</sup>Department of Genetics, LSU Health Sciences Center, New Orleans, Louisiana, 70112, USA

<sup>#</sup>These authors have contributed equally

**Competing financial interests:** The authors declare no competing financial interests

**Running title:** Epoxy attenuates breast tumor growth

**\*Correspondence:** Laboratory of Tumor Biology, Angiogenesis and Nanomedicine Research, National Centre for Cell Science (NCCS), Pune 411007, India; Email: [kundu@nccs.res.in](mailto:kundu@nccs.res.in)

**Email ID of Authors:**

Dhiraj Kumar: [dhirajbiot786@gmail.com](mailto:dhirajbiot786@gmail.com)

Saikat Haldar: [saikatbabu@gmail.com](mailto:saikatbabu@gmail.com)

Mahadeo Gorain: [mahadeo.gorain@gmail.com](mailto:mahadeo.gorain@gmail.com)

Santosh Kumar: [kumarsant@gmail.com](mailto:kumarsant@gmail.com)

Fayaj A Mulani: [mulanifayaj@gmail.com](mailto:mulanifayaj@gmail.com)

Amit S Yadav: [amit03@nccs.res.in](mailto:amit03@nccs.res.in)

Lucio Miele: [lmiele@lsuhsc.edu](mailto:lmiele@lsuhsc.edu)

Hirekodathakallu V. Thulasiram: [hv.thulasiram@ncl.res.in](mailto:hv.thulasiram@ncl.res.in)

Gopal C. Kundu: [kundu@nccs.res.in](mailto:kundu@nccs.res.in)

**Supplementary Table S1: List of antibodies used for western blot and immunofluorescence**

| Name of Antibody  | Catalog No. | Company Name   | Source | Application                       |
|-------------------|-------------|----------------|--------|-----------------------------------|
| Bax               | sc-526      | Santa Cruz     | Rabbit | WB, IP, IF, IHC(P) and ELISA      |
| Bad               | sc-8044     | Santa Cruz     | Mouse  | WB, IP, IF, IHC(P) and ELISA      |
| Bcl <sub>2</sub>  | sc-492      | Santa Cruz     | Rabbit | WB, IP, IF, IHC(P) and ELISA      |
| Cox2              | sc-1747     | Santa Cruz     | Goat   | WB, IP, IF, IHC(P) and ELISA      |
| p-Akt1/2/3        | sc-7985     | Santa Cruz     | Rabbit | WB, IP, IF, IHC(P) and ELISA      |
| Akt1/2            | sc-1619     | Santa Cruz     | Goat   | WB, IP, IF, IHC(P) and ELISA      |
| Flk1              | sc-6251     | Santa Cruz     | Mouse  | WB, IP, IF and IHC(P)             |
| VEGF              | sc-1876     | Santa Cruz     | Goat   | WB, IP, IF, IHC(P) and ELISA      |
| c-Jun             | sc-45       | Santa Cruz     | Rabbit | WB, IP, IF and ELISA              |
| c-Fos             | sc-52       | Santa Cruz     | Rabbit | WB, IP, IF, IHC(P), FCM and ELISA |
| AIF               | sc-13116    | Santa Cruz     | Mouse  | WB, IP, IF, IHC(P), FCM and ELISA |
| p-Akt             | 4060        | Cell Signaling | Rabbit | WB, IP, IF, F and IHC             |
| PI3K p85          | 4257        | Cell Signaling | Rabbit | WB and IP                         |
| p-PI3K p85        | 4228        | Cell Signaling | Rabbit | WB and IP                         |
| Cleaved Caspase-9 | 9508        | Cell Signaling | Mouse  | WB                                |
| Cleaved Caspase-3 | 9664        | Cell Signaling | Rabbit | WB, IP, IF, F and IHC             |
| PARP              | 9542        | Cell Signaling | Rabbit | WB                                |
| OPN               | Ab36125 (M) | Abcam          | Goat   | WB                                |

**Supplementary Table S2: IC<sub>50</sub> of epoxyazadiradione in breast cancer (MDA-MB-231 and MCF-7) cells**

| Time | IC <sub>50</sub> (μM) in MDA-MB-231 | IC <sub>50</sub> (μM) in MCF-7 |
|------|-------------------------------------|--------------------------------|
| 24 h | 95.69 ± 1.12                        | 114.81 ± 1.14                  |
| 48 h | 80.71 ± 1.21                        | 109.64 ± 10                    |
| 72 h | 66.93 ± 1.42                        | 84.72 ± 1.13                   |
| 96 h | 66.86 ± 1.63                        | 67.10 ± 1.05                   |

## **SUPPLEMENTARY FIGURE LEGENDS:**

### **Supplementary Figure 1: Epoxyazadiradione inhibits breast cancer cell viability. (a)**

ER+ breast cancer, MCF-7 cells were seeded into 96-well plate at density of  $1 \times 10^4$  cells/200  $\mu$ l and treated in absence or presence of ten major neem limonoids compounds (**1**: Epoxyazadiradione; **2**: Azadiradione; **3**: 17 $\beta$ -hydroxyazadiradione; **4**: Gedunin; **5**: Nimbin **6**: 6-Deacetylnimbin; **7**: Salannin; **8**: 3-Deacetylsalannin; **9**: Azadirachtin A; **10**: Azadirachtin B) at 100 and 200  $\mu$ M concentrations for 24 h. Further, cell viability was determined using MTT assay and data were analyzed statistically and represented graphically. (**b** and **c**) MDA-MB-231 and MCF-7 cells were treated with epoxyazadiradione (0-200  $\mu$ M) for 48 h, 72 h and 96 h and the cell viability was analyzed using MTT assay. (**d**) Normal human mammary epithelial cells, MCF-10A ( $1 \times 10^4$ ) were seeded into 96-well plate and treated with increasing concentration of epoxyazadiradione (0-200  $\mu$ M) for 24 h and 48 h. Cell viability was determined using MTT assay, analyzed statistically and represented into line graph. (**e**) MCF-7 cells were treated with epoxyazadiradione (0-150  $\mu$ M) for 24 h, stained with propidium iodide (PI) and analyzed the cell cycle distribution by FACSCalibur cytometer. Values are represented in mean  $\pm$  SEM of three independent experiments.

### **Supplementary Figure 2: Epoxyazadiradione induces cell death through ROS and AIF independent pathway in MCF-7 cells. (a)**

MCF-7 cells were treated with increasing concentrations of epoxyazadiradione and immunofluorescence staining was performed using phalloidin FITC or anti-AIF antibody and analyzed by confocal microscopy. Scale bar represents 10  $\mu$ m. (**b**) Bar graph represents the TUNEL positive cells upon epoxyazadiradione treatment in MDA-MB-231. Data are represented in mean  $\pm$  SEM of three independent experiments. (**c**) MCF-7 cells were treated with epoxyazadiradione in dose-dependent manner, stained with DHE at 37°C for 20 min and analyzed by flow cytometry. The percentage of DHE staining was quantified and represented graphically. (**d**) MDA-MB-

231 cells were pretreated with caspase inhibitor (40  $\mu$ M) for 1 h, wounded with constant width and treated with either epoxyzadiradione (20  $\mu$ M) or mitomycin C (10  $\mu$ g/ml) or in combination of both for further 12 h. Photographs of wound were taken at T = 0 and 12 h. Migrated distance were measured using Image-Pro plus software and analyzed statistically and represented graphically using Sigma Plot software (\*,  $p < 0.015$ ; \*\*\*,  $p < 0.0001$  by one-way ANOVA with untreated control cells).

**Supplementary Figure 3: Epoxyzadiradione attenuates breast cancer cell migration through downregulation of PI3K/Akt pathway.** (a) MCF-7 cells were treated with epoxyzadiradione in dose-dependent manner for 24 h and the expressions of p-Akt and c-Jun were analyzed by immunoblot. (b) MDA-MB-231 cells were transiently transfected with pcDNA6-HA-Akt1 for 48 h and the expression level of p-Akt1, Akt1 or HA were analyzed by western blot. Actin was served as loading control. (c) MDA-MB-231 cells were pretreated with or without epoxyzadiradione (20  $\mu$ M) or perifosine (10  $\mu$ M). In separate experiments, these cells were transiently transfected with Akt1 as described above followed by epoxyzadiradione (20  $\mu$ M) treatment for 12 h. These cells were added on upper portion of Transwell chamber and incubated for another 12 h at 37°C. Migrated cells to the lower side of Transwell membrane were stained with 5% Crystal Violet and photographed (10X magnification).

**a**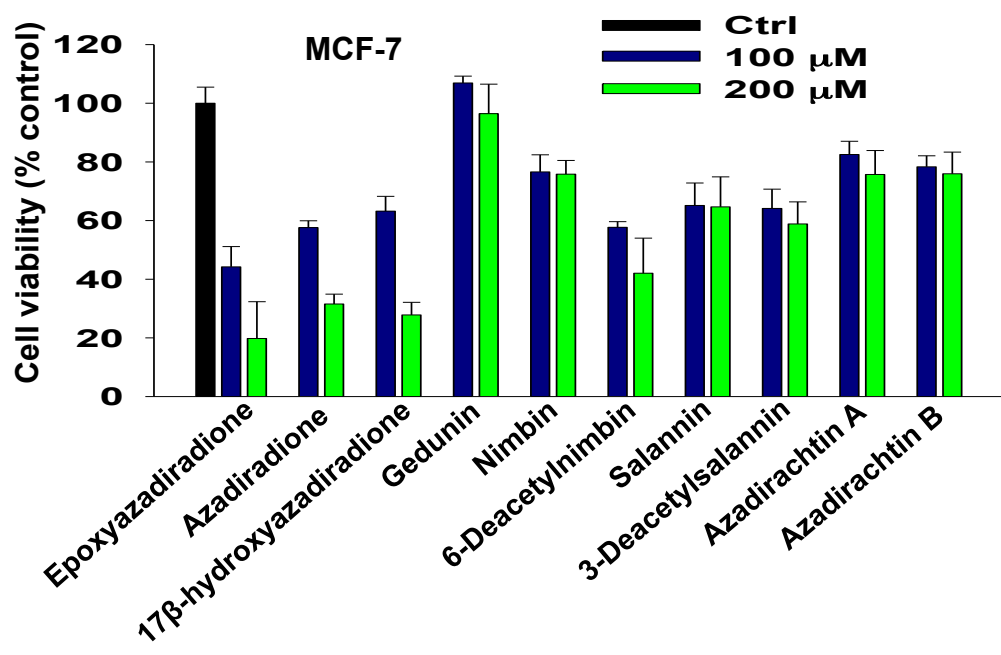**b**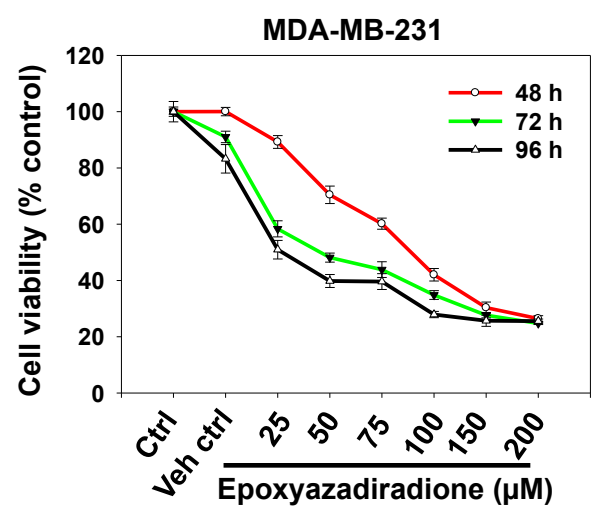**c**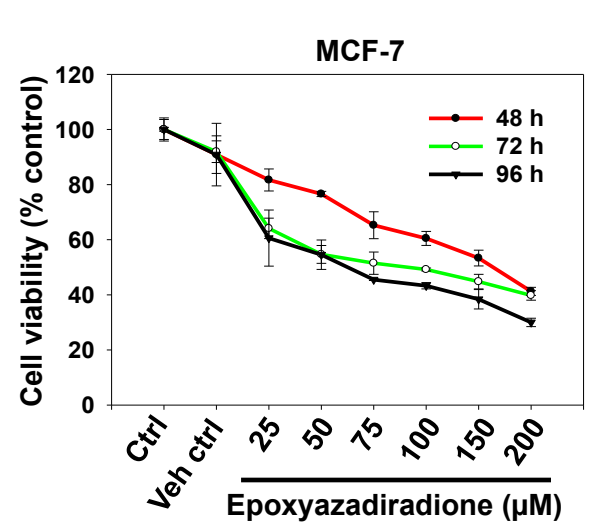**d**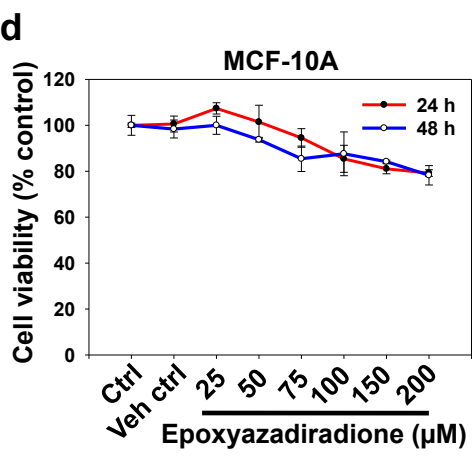**e**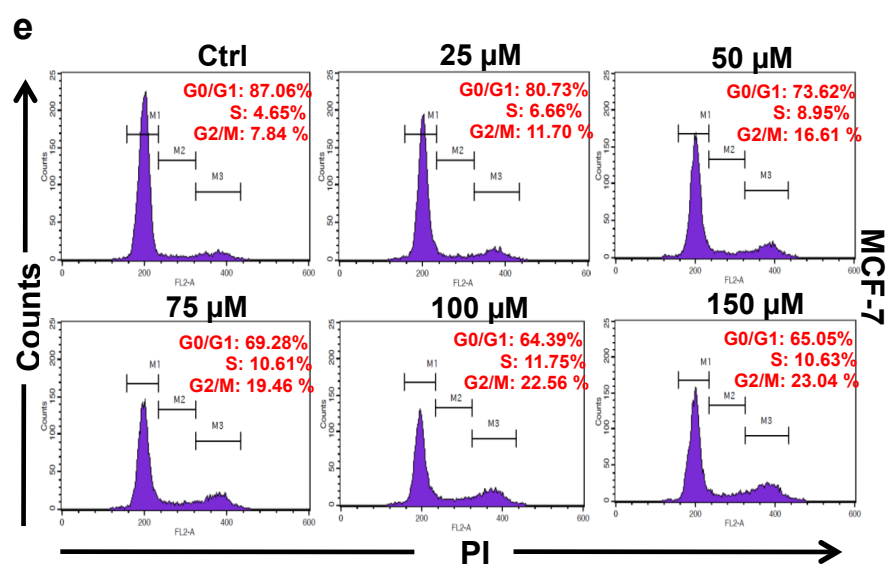

Supplementary Figure: 1 Kumar et al

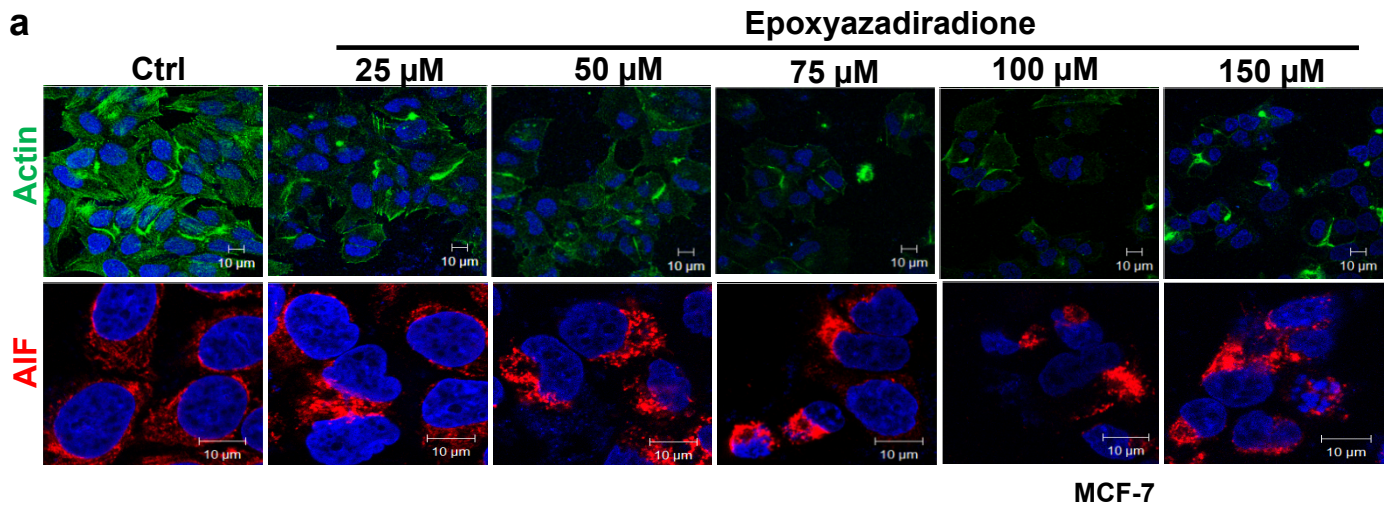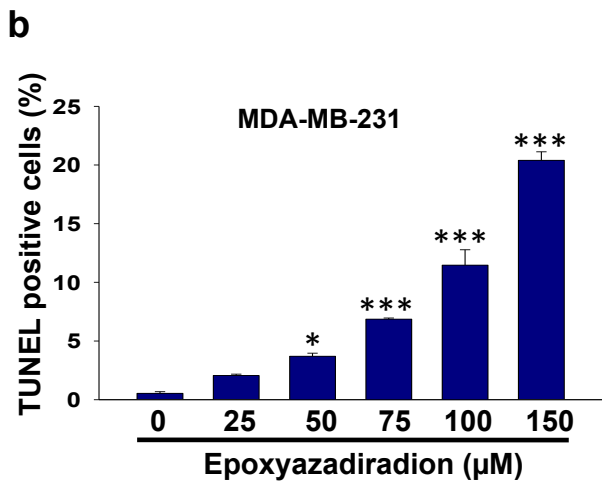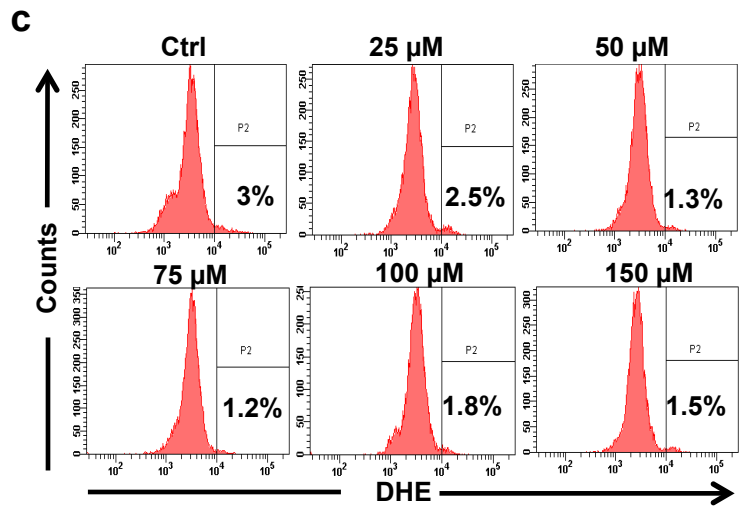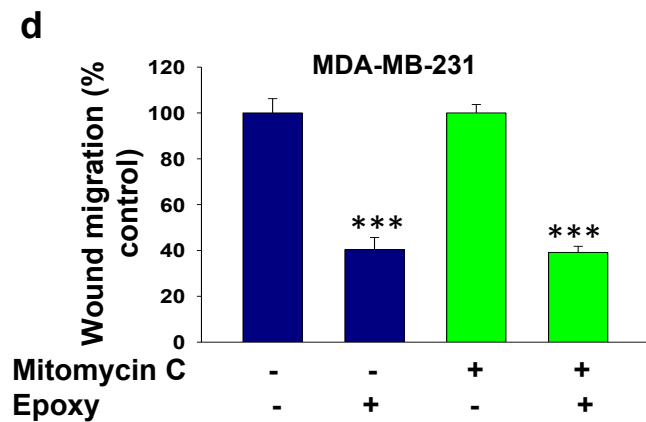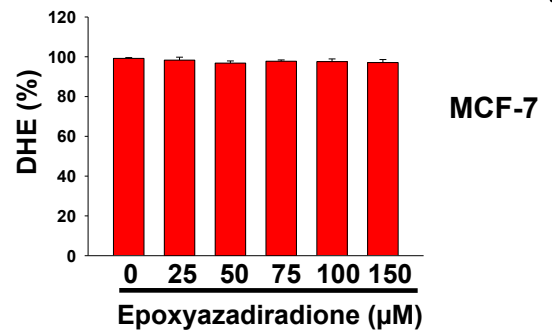

Supplementary Figure: 2 Kumar et al

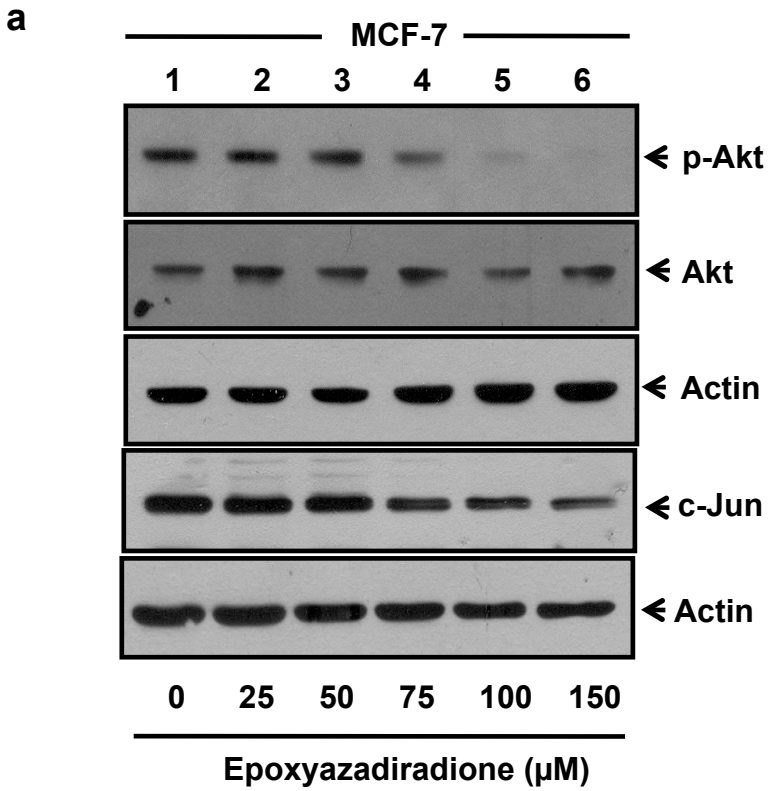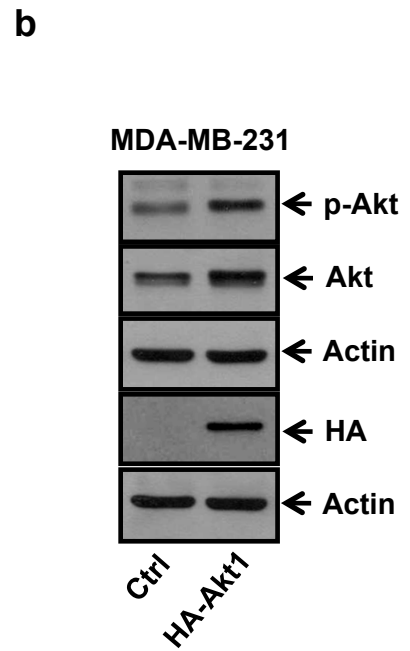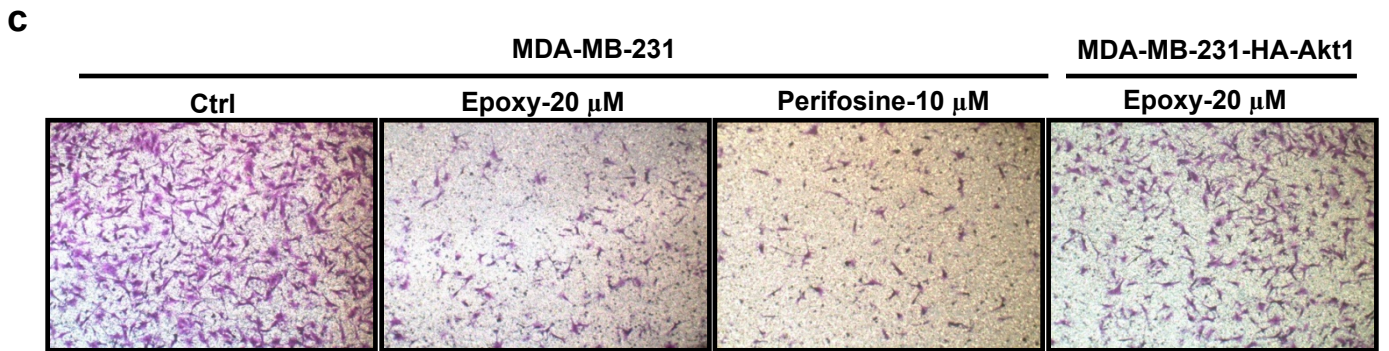

Supplementary Figure: 3 Kumar et al
